# Supplementary material for: The Statistical Value of Raw Fluorescence Signal in Luminex xMAP Based Multiplex Immunoassays
Source: PubMed Central journal article supplement (PMC4886638; doi:10.1038/srep26996), 2016-05-31
Supplement: srep26996-s1.pdf [file srep26996-s1.pdf]

## Supplementary Information for

### **The Statistical Value of Raw Fluorescence Signal in Luminex xMAP Based Multiplex Immunoassays.**

By Edmond J. Breen<sup>1</sup>, Woei Tan<sup>2</sup>, and Alamgir Khan<sup>1</sup>

<sup>1</sup>Australian Proteome Analysis Facility (APAF), Level 4, Building F7B, Research Park Drive, Macquarie University, Sydney NSW 2109 Australia.

<sup>2</sup>Bio-Rad Laboratories Inc. 2000 Alfred Nobel Drive, Hercules, CA 94547. USA

Table S1: Patient numbers according to plate, tissue and condition groupings. COPD= chronic obstructive pulmonary disease, Mono = mononucleosis, RA = rheumatoid arthritis, T2D = type 2 diabetes. Note, the 16 mononucleosis patients across plasma and serum are paired, as is the 6 patients with respect to myeloma. All other patient groups represent different people.

|        | Plate  | Condition |      |         |        |           |    |        |     | Total |
|--------|--------|-----------|------|---------|--------|-----------|----|--------|-----|-------|
|        |        | COPD      | Mono | Myeloma | Normal | Psoriasis | RA | Sepsis | T2D |       |
| Tissue | plasma |           |      |         | 16     | 10        |    |        | 43  | 69    |
|        | saliva | 1         |      |         |        |           |    |        |     |       |
|        | serum  |           | 9    |         |        |           |    |        |     | 9     |
|        | urine  |           |      |         |        |           |    |        |     |       |
|        | plasma | 2         |      |         |        |           |    |        |     |       |
|        | saliva |           |      |         | 17     |           | 20 |        |     | 37    |
|        | serum  |           |      |         |        |           |    |        |     |       |
|        | urine  |           |      |         |        |           |    |        |     |       |
|        | plasma | 3         |      | 16      | 6      |           |    |        |     | 22    |
| saliva |        |           |      |         | 10     |           |    |        | 10  |       |
| serum  |        |           | 16   | 6       | 2      |           | 10 |        | 34  |       |
| urine  |        |           |      |         | 10     |           |    |        | 10  |       |
| Total  |        | 9         | 32   | 12      | 55     | 10        | 20 | 10     | 43  | 191   |

Table S2: Fixed analyte, pairwise tissue comparisons.

| Analyte        | Contrast      | Df | Fluorescence |         |            |      | Concentration |         |            |      |
|----------------|---------------|----|--------------|---------|------------|------|---------------|---------|------------|------|
|                |               |    | Value        | Chisq   | Pr(>Chisq) | Sig. | Value         | Chisq   | Pr(>Chisq) | Sig. |
| April (42)     | plasma-saliva | 1  | 0.817        | 5.860   | 1.000      |      | 1.026         | 5.946   | 1.000      |      |
| Baff (37)      | plasma-saliva | 1  | 1.069        | 10.031  | 0.223      |      | 1.218         | 8.394   | 0.399      |      |
| CD163 (46)     | plasma-saliva | 1  | 4.392        | 169.203 | 0.000      | ***  | 5.189         | 142.799 | 0.000      | ***  |
| CD30 (53)      | plasma-saliva | 1  | 3.865        | 131.001 | 0.000      | ***  | 5.990         | 60.672  | 0.000      | ***  |
| Chitinase (72) | plasma-saliva | 1  | -0.512       | 2.296   | 1.000      |      | -0.310        | 0.542   | 1.000      |      |
| gp130 (14)     | plasma-saliva | 1  | -0.031       | 0.008   | 1.000      |      | 0.102         | 0.059   | 1.000      |      |
| IFN-a2 (20)    | plasma-saliva | 1  | -0.543       | 2.590   | 1.000      |      | -0.722        | 2.945   | 1.000      |      |
| IFN-b (44)     | plasma-saliva | 1  | -0.563       | 2.776   | 1.000      |      | -0.447        | 1.129   | 1.000      |      |
| IFN-g (21)     | plasma-saliva | 1  | -0.191       | 0.318   | 1.000      |      | 0.720         | 1.945   | 1.000      |      |
| IL-10 (56)     | plasma-saliva | 1  | -0.600       | 3.156   | 1.000      |      | -0.421        | 0.762   | 1.000      |      |
| IL-11 (39)     | plasma-saliva | 1  | -0.214       | 0.401   | 1.000      |      |               |         |            |      |
| IL-12p40 (28)  | plasma-saliva | 1  | -0.430       | 1.623   | 1.000      |      | -0.361        | 0.692   | 1.000      |      |
| IL-12p70 (75)  | plasma-saliva | 1  | -0.235       | 0.486   | 1.000      |      | -0.322        | 0.550   | 1.000      |      |
| IL-19 (29)     | plasma-saliva | 1  | -6.041       | 320.048 | 0.000      | ***  | -5.332        | 160.713 | 0.000      | ***  |
| IL-2 (38)      | plasma-saliva | 1  | -0.066       | 0.038   | 1.000      |      | 0.419         | 0.860   | 1.000      |      |
| IL-20 (30)     | plasma-saliva | 1  | -0.595       | 3.104   | 1.000      |      | -0.756        | 3.229   | 1.000      |      |
| IL-22 (18)     | plasma-saliva | 1  | -0.853       | 6.378   | 1.000      |      | -1.595        | 12.971  | 0.040      | *    |
| IL-26 (22)     | plasma-saliva | 1  | -1.079       | 10.221  | 0.204      |      | -1.371        | 10.630  | 0.128      |      |
| IL-27 (13)     | plasma-saliva | 1  | -0.320       | 0.895   | 1.000      |      | 0.423         | 0.910   | 1.000      |      |
| IL-28 (66)     | plasma-saliva | 1  | -0.067       | 0.039   | 1.000      |      | -0.046        | 0.011   | 1.000      |      |
| IL-29 (33)     | plasma-saliva | 1  | -0.321       | 0.904   | 1.000      |      | -1.393        | 8.069   | 0.459      |      |
| IL-32 (35)     | plasma-saliva | 1  | -1.269       | 14.118  | 0.026      | *    | -2.860        | 24.394  | 0.000      | ***  |
| IL-34 (15)     | plasma-saliva | 1  | -0.878       | 6.769   | 1.000      |      |               |         |            |      |
| IL-35 (34)     | plasma-saliva | 1  | -1.284       | 14.452  | 0.022      | *    | -1.473        | 12.265  | 0.056      | .    |
| IL-6RA (19)    | plasma-saliva | 1  | 4.286        | 161.115 | 0.000      | ***  | 4.999         | 141.295 | 0.000      | ***  |
| IL-8 (54)      | plasma-saliva | 1  | -7.391       | 479.089 | 0.000      | ***  | -5.954        | 200.424 | 0.000      | ***  |
| Light (51)     | plasma-saliva | 1  | 0.107        | 0.101   | 1.000      |      |               |         |            |      |
| MMP-1 (43)     | plasma-saliva | 1  | -0.323       | 0.917   | 1.000      |      | -0.517        | 1.374   | 1.000      |      |
| MMP-2 (26)     | plasma-saliva | 1  | 2.890        | 73.235  | 0.000      | ***  | 3.552         | 62.163  | 0.000      | ***  |
| MMP-3 (45)     | plasma-saliva | 1  | 3.480        | 106.228 | 0.000      | ***  |               |         |            |      |
| OCN (65)       | plasma-saliva | 1  | 4.475        | 175.641 | 0.000      | ***  | 7.731         | 179.736 | 0.000      | ***  |
| OPN (77)       | plasma-saliva | 1  | 8.552        | 641.545 | 0.000      | ***  | 6.195         | 203.495 | 0.000      | ***  |
| Pentraxin (48) | plasma-saliva | 1  | -1.421       | 17.708  | 0.004      | **   | -1.260        | 8.972   | 0.302      |      |
| TNFR1 (73)     | plasma-saliva | 1  | 0.017        | 0.003   | 1.000      |      | 0.112         | 0.071   | 1.000      |      |
| TNFR2 (67)     | plasma-saliva | 1  | 4.104        | 147.705 | 0.000      | ***  | 4.623         | 113.354 | 0.000      | ***  |
| TSLP (52)      | plasma-saliva | 1  | -0.235       | 0.485   | 1.000      |      | 0.261         | 0.361   | 1.000      |      |
| Tweak (62)     | plasma-saliva | 1  | -0.176       | 0.271   | 1.000      |      | 0.301         | 0.513   | 1.000      |      |
| April (42)     | plasma-serum  | 1  | 1.027        | 28.363  | 0.000      | ***  | 0.808         | 12.389  | 0.053      | .    |
| Baff (37)      | plasma-serum  | 1  | -0.583       | 9.151   | 0.351      |      | -0.285        | 1.544   | 1.000      |      |
| CD163 (46)     | plasma-serum  | 1  | -0.367       | 3.613   | 1.000      |      | -0.310        | 1.822   | 1.000      |      |
| CD30 (53)      | plasma-serum  | 1  | -0.277       | 2.057   | 1.000      |      | -0.308        | 1.806   | 1.000      |      |
| Chitinase (72) | plasma-serum  | 1  | -0.614       | 10.124  | 0.214      |      | -0.630        | 7.432   | 0.634      |      |
| gp130 (14)     | plasma-serum  | 1  | -0.397       | 4.250   | 1.000      |      | -0.582        | 6.426   | 1.000      |      |
| IFN-a2 (20)    | plasma-serum  | 1  | 0.116        | 0.361   | 1.000      |      | 0.498         | 4.671   | 1.000      |      |
| IFN-b (44)     | plasma-serum  | 1  | -0.050       | 0.068   | 1.000      |      | -0.181        | 0.614   | 1.000      |      |
| IFN-g (21)     | plasma-serum  | 1  | 0.234        | 1.470   | 1.000      |      | 1.781         | 22.662  | 0.000      | ***  |
| IL-10 (56)     | plasma-serum  | 1  | -0.044       | 0.052   | 1.000      |      | -0.411        | 1.800   | 1.000      |      |
| IL-11 (39)     | plasma-serum  | 1  | 0.075        | 0.152   | 1.000      |      |               |         |            |      |
| IL-12p40 (28)  | plasma-serum  | 1  | 0.149        | 0.596   | 1.000      |      | 0.705         | 9.357   | 0.249      |      |
| IL-12p70 (75)  | plasma-serum  | 1  | 0.067        | 0.119   | 1.000      |      | 0.089         | 0.150   | 1.000      |      |
| IL-19 (29)     | plasma-serum  | 1  | -0.087       | 0.203   | 1.000      |      | -0.369        | 2.591   | 1.000      |      |
| IL-2 (38)      | plasma-serum  | 1  | 0.150        | 0.605   | 1.000      |      | 1.002         | 18.098  | 0.003      | **   |
| IL-20 (30)     | plasma-serum  | 1  | 0.018        | 0.009   | 1.000      |      | 0.232         | 1.022   | 1.000      |      |
| IL-22 (18)     | plasma-serum  | 1  | 0.145        | 0.562   | 1.000      |      | 0.284         | 0.977   | 1.000      |      |
| IL-26 (22)     | plasma-serum  | 1  | -0.119       | 0.380   | 1.000      |      | -0.115        | 0.252   | 1.000      |      |
| IL-27 (13)     | plasma-serum  | 1  | 0.493        | 6.471   | 1.000      |      | 0.956         | 12.880  | 0.041      | *    |
| IL-28 (66)     | plasma-serum  | 1  | 0.203        | 1.110   | 1.000      |      | 0.617         | 7.097   | 0.741      |      |

|                |              |   |        |         |       |        |        |         |       |     |
|----------------|--------------|---|--------|---------|-------|--------|--------|---------|-------|-----|
| IL-29 (33)     | plasma-serum | 1 | 0.228  | 1.402   | 1.000 | 0.616  | 5.147  | 1.000   |       |     |
| IL-32 (35)     | plasma-serum | 1 | 0.152  | 0.619   | 1.000 | -0.160 | 0.259  | 1.000   |       |     |
| IL-34 (15)     | plasma-serum | 1 | -0.140 | 0.525   | 1.000 |        |        |         |       |     |
| IL-35 (34)     | plasma-serum | 1 | -0.021 | 0.012   | 1.000 | 0.148  | 0.417  | 1.000   |       |     |
| IL-6RA (19)    | plasma-serum | 1 | -0.447 | 5.371   | 1.000 | -0.506 | 4.864  | 1.000   |       |     |
| IL-8 (54)      | plasma-serum | 1 | -0.301 | 2.441   | 1.000 | -0.445 | 3.761  | 1.000   |       |     |
| Light (51)     | plasma-serum | 1 | -0.128 | 0.440   | 1.000 |        |        |         |       |     |
| MMP-1 (43)     | plasma-serum | 1 | -0.473 | 6.022   | 1.000 | -1.677 | 42.490 | 0.000   | ***   |     |
| MMP-2 (26)     | plasma-serum | 1 | -1.470 | 58.131  | 0.000 | ***    | -1.220 | 28.236  | 0.000 | *** |
| MMP-3 (45)     | plasma-serum | 1 | -0.528 | 7.491   | 0.843 |        |        |         |       |     |
| OCN (65)       | plasma-serum | 1 | 0.008  | 0.002   | 1.000 | 0.076  | 0.110  | 1.000   |       |     |
| OPN (77)       | plasma-serum | 1 | 1.234  | 40.934  | 0.000 | ***    | 0.854  | 13.849  | 0.026 | *   |
| Pentraxin (48) | plasma-serum | 1 | 0.258  | 1.789   | 1.000 | 0.324  | 1.990  | 1.000   |       |     |
| TNFR1 (73)     | plasma-serum | 1 | -0.633 | 10.790  | 0.151 | -0.741 | 10.430 | 0.141   |       |     |
| TNFR2 (67)     | plasma-serum | 1 | -0.833 | 18.673  | 0.002 | **     | -0.758 | 10.902  | 0.112 |     |
| TSLP (52)      | plasma-serum | 1 | 0.005  | 0.001   | 1.000 | 0.025  | 0.012  | 1.000   |       |     |
| Tweak (62)     | plasma-serum | 1 | -0.234 | 1.469   | 1.000 | -0.128 | 0.310  | 1.000   |       |     |
| April (42)     | plasma-urine | 1 | 0.924  | 7.491   | 0.843 | 1.173  | 7.781  | 0.528   |       |     |
| Baff (37)      | plasma-urine | 1 | 2.892  | 73.339  | 0.000 | ***    | 2.859  | 46.198  | 0.000 | *** |
| CD163 (46)     | plasma-urine | 1 | 2.590  | 58.822  | 0.000 | ***    | 3.176  | 57.024  | 0.000 | *** |
| CD30 (53)      | plasma-urine | 1 | -1.450 | 18.447  | 0.003 | **     | -1.477 | 12.333  | 0.054 | .   |
| Chitinase (72) | plasma-urine | 1 | 5.959  | 311.470 | 0.000 | ***    | 6.529  | 240.668 | 0.000 | *** |
| gp130 (14)     | plasma-urine | 1 | 2.915  | 74.548  | 0.000 | ***    | 4.105  | 95.260  | 0.000 | *** |
| IFN-a2 (20)    | plasma-urine | 1 | -0.567 | 2.818   | 1.000 | -0.895 | 4.519  | 1.000   |       |     |
| IFN-b (44)     | plasma-urine | 1 | -0.848 | 6.303   | 1.000 | -1.419 | 11.362 | 0.090   | .     |     |
| IFN-g (21)     | plasma-urine | 1 | -0.733 | 4.715   | 1.000 | -0.897 | 4.079  | 1.000   |       |     |
| IL-10 (56)     | plasma-urine | 1 | -0.408 | 1.462   | 1.000 | 0.445  | 0.800  | 1.000   |       |     |
| IL-11 (39)     | plasma-urine | 1 | -0.073 | 0.047   | 1.000 |        |        |         |       |     |
| IL-12p40 (28)  | plasma-urine | 1 | -0.129 | 0.145   | 1.000 | 0.112  | 0.070  | 1.000   |       |     |
| IL-12p70 (75)  | plasma-urine | 1 | -0.157 | 0.215   | 1.000 | -0.276 | 0.430  | 1.000   |       |     |
| IL-19 (29)     | plasma-urine | 1 | -0.552 | 2.675   | 1.000 | -0.931 | 4.902  | 1.000   |       |     |
| IL-2 (38)      | plasma-urine | 1 | -0.359 | 1.129   | 1.000 | -1.140 | 7.285  | 0.682   |       |     |
| IL-20 (30)     | plasma-urine | 1 | -0.810 | 5.760   | 1.000 | -1.412 | 11.275 | 0.093   | .     |     |
| IL-22 (18)     | plasma-urine | 1 | -0.899 | 7.086   | 1.000 | -2.091 | 22.300 | 0.000   | ***   |     |
| IL-26 (22)     | plasma-urine | 1 | -0.729 | 4.666   | 1.000 | -0.989 | 5.529  | 1.000   |       |     |
| IL-27 (13)     | plasma-urine | 1 | -0.665 | 3.879   | 1.000 | -0.749 | 2.857  | 1.000   |       |     |
| IL-28 (66)     | plasma-urine | 1 | -0.102 | 0.091   | 1.000 | -0.325 | 0.596  | 1.000   |       |     |
| IL-29 (33)     | plasma-urine | 1 | -0.475 | 1.981   | 1.000 | -1.599 | 13.059 | 0.038   | *     |     |
| IL-32 (35)     | plasma-urine | 1 | -2.614 | 59.937  | 0.000 | ***    | -4.303 | 63.683  | 0.000 | *** |
| IL-34 (15)     | plasma-urine | 1 | -0.973 | 8.310   | 0.540 |        |        |         |       |     |
| IL-35 (34)     | plasma-urine | 1 | -0.356 | 1.109   | 1.000 | -0.123 | 0.086  | 1.000   |       |     |
| IL-6RA (19)    | plasma-urine | 1 | 2.499  | 54.759  | 0.000 | ***    | 2.955  | 49.372  | 0.000 | *** |
| IL-8 (54)      | plasma-urine | 1 | -0.065 | 0.037   | 1.000 | 0.089  | 0.044  | 1.000   |       |     |
| Light (51)     | plasma-urine | 1 | -1.691 | 25.095  | 0.000 | ***    |        |         |       |     |
| MMP-1 (43)     | plasma-urine | 1 | 0.101  | 0.090   | 1.000 | 0.601  | 1.972  | 1.000   |       |     |
| MMP-2 (26)     | plasma-urine | 1 | 2.343  | 48.140  | 0.000 | ***    | 3.116  | 51.532  | 0.000 | *** |
| MMP-3 (45)     | plasma-urine | 1 | 3.430  | 103.216 | 0.000 | ***    |        |         |       |     |
| OCN (65)       | plasma-urine | 1 | 3.495  | 107.127 | 0.000 | ***    | 3.559  | 71.622  | 0.000 | *** |
| OPN (77)       | plasma-urine | 1 | -0.126 | 0.138   | 1.000 | -0.974 | 2.858  | 1.000   |       |     |
| Pentraxin (48) | plasma-urine | 1 | 2.976  | 77.669  | 0.000 | ***    | 4.174  | 98.502  | 0.000 | *** |
| TNFR1 (73)     | plasma-urine | 1 | -1.534 | 20.642  | 0.001 | ***    | -1.919 | 20.811  | 0.001 | *** |
| TNFR2 (67)     | plasma-urine | 1 | -1.660 | 24.179  | 0.000 | ***    | -1.695 | 16.243  | 0.008 | **  |
| TSLP (52)      | plasma-urine | 1 | -0.336 | 0.989   | 1.000 | -0.104 | 0.061  | 1.000   |       |     |
| Tweak (62)     | plasma-urine | 1 | 1.059  | 9.828   | 0.246 | 1.751  | 17.330 | 0.004   | **    |     |
| April (42)     | saliva-serum | 1 | 0.210  | 0.398   | 1.000 | -0.218 | 0.279  | 1.000   |       |     |
| Baff (37)      | saliva-serum | 1 | -1.653 | 24.765  | 0.000 | ***    | -1.504 | 13.303  | 0.034 | *   |
| CD163 (46)     | saliva-serum | 1 | -4.759 | 205.310 | 0.000 | ***    | -5.499 | 166.467 | 0.000 | *** |
| CD30 (53)      | saliva-serum | 1 | -4.141 | 155.488 | 0.000 | ***    | -6.299 | 67.875  | 0.000 | *** |
| Chitinase (72) | saliva-serum | 1 | -0.102 | 0.094   | 1.000 | -0.320 | 0.603  | 1.000   |       |     |
| gp130 (14)     | saliva-serum | 1 | -0.367 | 1.219   | 1.000 | -0.684 | 2.754  | 1.000   |       |     |
| IFN-a2 (20)    | saliva-serum | 1 | 0.659  | 3.940   | 1.000 | 1.221  | 8.693  | 0.342   |       |     |
| IFN-b (44)     | saliva-serum | 1 | 0.512  | 2.380   | 1.000 | 0.266  | 0.414  | 1.000   |       |     |
| IFN-g (21)     | saliva-serum | 1 | 0.424  | 1.632   | 1.000 | 1.061  | 3.284  | 1.000   |       |     |

|                |              |   |        |         |       |       |        |         |       |     |
|----------------|--------------|---|--------|---------|-------|-------|--------|---------|-------|-----|
| IL-10 (56)     | saliva-serum | 1 | 0.556  | 2.799   | 1.000 | 0.010 | 0.000  | 1.000   |       |     |
| IL-11 (39)     | saliva-serum | 1 | 0.289  | 0.758   | 1.000 |       |        |         |       |     |
| IL-12p40 (28)  | saliva-serum | 1 | 0.579  | 3.040   | 1.000 | 1.067 | 6.215  | 1.000   |       |     |
| IL-12p70 (75)  | saliva-serum | 1 | 0.302  | 0.827   | 1.000 | 0.412 | 0.925  | 1.000   |       |     |
| IL-19 (29)     | saliva-serum | 1 | 5.954  | 321.390 | 0.000 | ***   | 4.962  | 144.885 | 0.000 | *** |
| IL-2 (38)      | saliva-serum | 1 | 0.216  | 0.422   | 1.000 | 0.582 | 1.660  | 1.000   |       |     |
| IL-20 (30)     | saliva-serum | 1 | 0.613  | 3.406   | 1.000 | 0.988 | 5.741  | 1.000   |       |     |
| IL-22 (18)     | saliva-serum | 1 | 0.997  | 9.018   | 0.374 | 1.879 | 14.220 | 0.021   | *     |     |
| IL-26 (22)     | saliva-serum | 1 | 0.961  | 8.368   | 0.527 | 1.256 | 9.281  | 0.257   |       |     |
| IL-27 (13)     | saliva-serum | 1 | 0.812  | 5.981   | 1.000 | 0.533 | 1.326  | 1.000   |       |     |
| IL-28 (66)     | saliva-serum | 1 | 0.270  | 0.662   | 1.000 | 0.663 | 2.380  | 1.000   |       |     |
| IL-29 (33)     | saliva-serum | 1 | 0.549  | 2.735   | 1.000 | 2.009 | 14.819 | 0.016   | *     |     |
| IL-32 (35)     | saliva-serum | 1 | 1.420  | 18.294  | 0.003 | **    | 2.700  | 24.064  | 0.000 | *** |
| IL-34 (15)     | saliva-serum | 1 | 0.739  | 4.948   | 1.000 |       |        |         |       |     |
| IL-35 (34)     | saliva-serum | 1 | 1.263  | 14.452  | 0.022 | *     | 1.621  | 15.462  | 0.011 | *   |
| IL-6RA (19)    | saliva-serum | 1 | -4.733 | 203.083 | 0.000 | ***   | -5.505 | 178.334 | 0.000 | *** |
| IL-8 (54)      | saliva-serum | 1 | 7.089  | 455.675 | 0.000 | ***   | 5.509  | 178.569 | 0.000 | *** |
| Light (51)     | saliva-serum | 1 | -0.235 | 0.502   | 1.000 |       |        |         |       |     |
| MMP-1 (43)     | saliva-serum | 1 | -0.150 | 0.203   | 1.000 |       | -1.160 | 7.053   | 0.752 |     |
| MMP-2 (26)     | saliva-serum | 1 | -4.360 | 172.328 | 0.000 | ***   | -4.772 | 116.128 | 0.000 | *** |
| MMP-3 (45)     | saliva-serum | 1 | -4.008 | 145.636 | 0.000 | ***   |        |         |       |     |
| OCN (65)       | saliva-serum | 1 | -4.467 | 180.877 | 0.000 | ***   | -7.655 | 179.959 | 0.000 | *** |
| OPN (77)       | saliva-serum | 1 | -7.319 | 485.638 | 0.000 | ***   | -5.341 | 157.013 | 0.000 | *** |
| Pentraxin (48) | saliva-serum | 1 | 1.679  | 25.552  | 0.000 | ***   | 1.583  | 14.752  | 0.016 | *   |
| TNFR1 (73)     | saliva-serum | 1 | -0.650 | 3.835   | 1.000 |       | -0.853 | 4.284   | 1.000 |     |
| TNFR2 (67)     | saliva-serum | 1 | -4.937 | 220.978 | 0.000 | ***   | -5.381 | 159.409 | 0.000 | *** |
| TSLP (52)      | saliva-serum | 1 | 0.240  | 0.522   | 1.000 |       | -0.236 | 0.306   | 1.000 |     |
| Tweak (62)     | saliva-serum | 1 | -0.058 | 0.031   | 1.000 |       | -0.429 | 1.084   | 1.000 |     |
| April (42)     | saliva-urine | 1 | 0.107  | 0.073   | 1.000 |       | 0.148  | 0.087   | 1.000 |     |
| Baff (37)      | saliva-urine | 1 | 1.822  | 21.176  | 0.001 | ***   | 1.640  | 10.722  | 0.123 |     |
| CD163 (46)     | saliva-urine | 1 | -1.802 | 20.721  | 0.001 | ***   | -2.013 | 15.436  | 0.011 | *   |
| CD30 (53)      | saliva-urine | 1 | -5.315 | 180.156 | 0.000 | ***   | -7.467 | 83.794  | 0.000 | *** |
| Chitinase (72) | saliva-urine | 1 | 6.471  | 267.040 | 0.000 | ***   | 6.839  | 186.403 | 0.000 | *** |
| gp130 (14)     | saliva-urine | 1 | 2.946  | 55.358  | 0.000 | ***   | 4.002  | 63.852  | 0.000 | *** |
| IFN-a2 (20)    | saliva-urine | 1 | -0.023 | 0.003   | 1.000 |       | -0.172 | 0.118   | 1.000 |     |
| IFN-b (44)     | saliva-urine | 1 | -0.285 | 0.519   | 1.000 |       | -0.972 | 3.762   | 1.000 |     |
| IFN-g (21)     | saliva-urine | 1 | -0.543 | 1.878   | 1.000 |       | -1.617 | 8.163   | 0.445 |     |
| IL-10 (56)     | saliva-urine | 1 | 0.192  | 0.234   | 1.000 |       | 0.866  | 2.597   | 1.000 |     |
| IL-11 (39)     | saliva-urine | 1 | 0.141  | 0.126   | 1.000 |       |        |         |       |     |
| IL-12p40 (28)  | saliva-urine | 1 | 0.302  | 0.580   | 1.000 |       | 0.473  | 0.852   | 1.000 |     |
| IL-12p70 (75)  | saliva-urine | 1 | 0.079  | 0.040   | 1.000 |       | 0.046  | 0.008   | 1.000 |     |
| IL-19 (29)     | saliva-urine | 1 | 5.488  | 192.109 | 0.000 | ***   | 4.400  | 77.182  | 0.000 | *** |
| IL-2 (38)      | saliva-urine | 1 | -0.293 | 0.548   | 1.000 |       | -1.559 | 8.775   | 0.330 |     |
| IL-20 (30)     | saliva-urine | 1 | -0.215 | 0.296   | 1.000 |       | -0.656 | 1.718   | 1.000 |     |
| IL-22 (18)     | saliva-urine | 1 | -0.046 | 0.014   | 1.000 |       | -0.496 | 0.982   | 1.000 |     |
| IL-26 (22)     | saliva-urine | 1 | 0.350  | 0.782   | 1.000 |       | 0.382  | 0.583   | 1.000 |     |
| IL-27 (13)     | saliva-urine | 1 | -0.346 | 0.762   | 1.000 |       | -1.172 | 5.477   | 1.000 |     |
| IL-28 (66)     | saliva-urine | 1 | -0.035 | 0.008   | 1.000 |       | -0.279 | 0.297   | 1.000 |     |
| IL-29 (33)     | saliva-urine | 1 | -0.154 | 0.152   | 1.000 |       | -0.206 | 0.144   | 1.000 |     |
| IL-32 (35)     | saliva-urine | 1 | -1.345 | 11.544  | 0.101 |       | -1.443 | 7.053   | 0.752 |     |
| IL-34 (15)     | saliva-urine | 1 | -0.095 | 0.057   | 1.000 |       |        |         |       |     |
| IL-35 (34)     | saliva-urine | 1 | 0.928  | 5.492   | 1.000 |       | 1.350  | 7.262   | 0.683 |     |
| IL-6RA (19)    | saliva-urine | 1 | -1.787 | 20.373  | 0.001 | **    | -2.044 | 16.653  | 0.006 | **  |
| IL-8 (54)      | saliva-urine | 1 | 7.326  | 342.250 | 0.000 | ***   | 6.043  | 145.537 | 0.000 | *** |
| Light (51)     | saliva-urine | 1 | -1.799 | 20.639  | 0.001 | ***   |        |         |       |     |
| MMP-1 (43)     | saliva-urine | 1 | 0.425  | 1.151   | 1.000 |       | 1.118  | 4.762   | 1.000 |     |
| MMP-2 (26)     | saliva-urine | 1 | -0.547 | 1.907   | 1.000 |       | -0.437 | 0.661   | 1.000 |     |
| MMP-3 (45)     | saliva-urine | 1 | -0.050 | 0.016   | 1.000 |       |        |         |       |     |
| OCN (65)       | saliva-urine | 1 | -0.980 | 6.127   | 1.000 |       | -4.171 | 42.805  | 0.000 | *** |
| OPN (77)       | saliva-urine | 1 | -8.678 | 480.277 | 0.000 | ***   | -7.169 | 122.992 | 0.000 | *** |
| Pentraxin (48) | saliva-urine | 1 | 4.397  | 123.282 | 0.000 | ***   | 5.434  | 117.685 | 0.000 | *** |
| TNFR1 (73)     | saliva-urine | 1 | -1.551 | 15.344  | 0.014 | *     | -2.031 | 16.435  | 0.007 | **  |
| TNFR2 (67)     | saliva-urine | 1 | -5.764 | 211.887 | 0.000 | ***   | -6.318 | 152.033 | 0.000 | *** |

|                |              |   |        |         |       |     |        |         |       |     |
|----------------|--------------|---|--------|---------|-------|-----|--------|---------|-------|-----|
| TSLP (52)      | saliva-urine | 1 | -0.101 | 0.065   | 1.000 |     | -0.365 | 0.506   | 1.000 |     |
| Tweak (62)     | saliva-urine | 1 | 1.234  | 9.716   | 0.259 |     | 1.449  | 8.374   | 0.400 |     |
| April (42)     | serum-urine  | 1 | -0.103 | 0.096   | 1.000 |     | 0.365  | 0.786   | 1.000 |     |
| Baff (37)      | serum-urine  | 1 | 3.475  | 109.479 | 0.000 | *** | 3.144  | 58.151  | 0.000 | *** |
| CD163 (46)     | serum-urine  | 1 | 2.956  | 79.232  | 0.000 | *** | 3.486  | 71.488  | 0.000 | *** |
| CD30 (53)      | serum-urine  | 1 | -1.174 | 12.489  | 0.062 | .   | -1.169 | 8.034   | 0.464 |     |
| Chitinase (72) | serum-urine  | 1 | 6.573  | 391.671 | 0.000 | *** | 7.159  | 301.307 | 0.000 | *** |
| gp130 (14)     | serum-urine  | 1 | 3.313  | 99.505  | 0.000 | *** | 4.687  | 129.234 | 0.000 | *** |
| IFN-a2 (20)    | serum-urine  | 1 | -0.683 | 4.225   | 1.000 |     | -1.393 | 11.322  | 0.091 | .   |
| IFN-b (44)     | serum-urine  | 1 | -0.798 | 5.767   | 1.000 |     | -1.238 | 8.944   | 0.304 |     |
| IFN-g (21)     | serum-urine  | 1 | -0.967 | 8.477   | 0.500 |     | -2.678 | 26.200  | 0.000 | *** |
| IL-10 (56)     | serum-urine  | 1 | -0.364 | 1.202   | 1.000 |     | 0.855  | 2.592   | 1.000 |     |
| IL-11 (39)     | serum-urine  | 1 | -0.148 | 0.200   | 1.000 |     |        |         |       |     |
| IL-12p40 (28)  | serum-urine  | 1 | -0.278 | 0.698   | 1.000 |     | -0.594 | 2.056   | 1.000 |     |
| IL-12p70 (75)  | serum-urine  | 1 | -0.223 | 0.452   | 1.000 |     | -0.365 | 0.779   | 1.000 |     |
| IL-19 (29)     | serum-urine  | 1 | -0.465 | 1.964   | 1.000 |     | -0.562 | 1.857   | 1.000 |     |
| IL-2 (38)      | serum-urine  | 1 | -0.509 | 2.347   | 1.000 |     | -2.141 | 25.739  | 0.000 | *** |
| IL-20 (30)     | serum-urine  | 1 | -0.828 | 6.222   | 1.000 |     | -1.644 | 15.907  | 0.009 | **  |
| IL-22 (18)     | serum-urine  | 1 | -1.043 | 9.871   | 0.242 |     | -2.376 | 22.723  | 0.000 | *** |
| IL-26 (22)     | serum-urine  | 1 | -0.611 | 3.380   | 1.000 |     | -0.874 | 4.490   | 1.000 |     |
| IL-27 (13)     | serum-urine  | 1 | -1.158 | 12.153  | 0.074 | .   | -1.706 | 13.552  | 0.030 | *   |
| IL-28 (66)     | serum-urine  | 1 | -0.305 | 0.845   | 1.000 |     | -0.942 | 5.134   | 1.000 |     |
| IL-29 (33)     | serum-urine  | 1 | -0.704 | 4.488   | 1.000 |     | -2.215 | 21.548  | 0.000 | *** |
| IL-32 (35)     | serum-urine  | 1 | -2.766 | 69.359  | 0.000 | *** | -4.144 | 66.420  | 0.000 | *** |
| IL-34 (15)     | serum-urine  | 1 | -0.834 | 6.301   | 1.000 |     |        |         |       |     |
| IL-35 (34)     | serum-urine  | 1 | -0.335 | 1.015   | 1.000 |     | -0.271 | 0.433   | 1.000 |     |
| IL-6RA (19)    | serum-urine  | 1 | 2.946  | 78.661  | 0.000 | *** | 3.461  | 70.492  | 0.000 | *** |
| IL-8 (54)      | serum-urine  | 1 | 0.236  | 0.506   | 1.000 |     | 0.534  | 1.676   | 1.000 |     |
| Light (51)     | serum-urine  | 1 | -1.564 | 22.164  | 0.000 | *** |        |         |       |     |
| MMP-1 (43)     | serum-urine  | 1 | 0.575  | 2.994   | 1.000 |     | 2.278  | 28.988  | 0.000 | *** |
| MMP-2 (26)     | serum-urine  | 1 | 3.813  | 131.811 | 0.000 | *** | 4.335  | 103.574 | 0.000 | *** |
| MMP-3 (45)     | serum-urine  | 1 | 3.958  | 142.047 | 0.000 | *** |        |         |       |     |
| OCN (65)       | serum-urine  | 1 | 3.486  | 110.205 | 0.000 | *** | 3.483  | 71.384  | 0.000 | *** |
| OPN (77)       | serum-urine  | 1 | -1.359 | 16.750  | 0.007 | **  | -1.828 | 10.279  | 0.152 |     |
| Pentraxin (48) | serum-urine  | 1 | 2.718  | 66.973  | 0.000 | *** | 3.850  | 87.230  | 0.000 | *** |
| TNFR1 (73)     | serum-urine  | 1 | -0.901 | 7.355   | 0.896 |     | -1.177 | 8.156   | 0.445 |     |
| TNFR2 (67)     | serum-urine  | 1 | -0.827 | 6.202   | 1.000 |     | -0.937 | 5.168   | 1.000 |     |
| TSLP (52)      | serum-urine  | 1 | -0.341 | 1.052   | 1.000 |     | -0.129 | 0.098   | 1.000 |     |
| Tweak (62)     | serum-urine  | 1 | 1.292  | 15.141  | 0.015 | *   | 1.879  | 20.766  | 0.001 | *** |

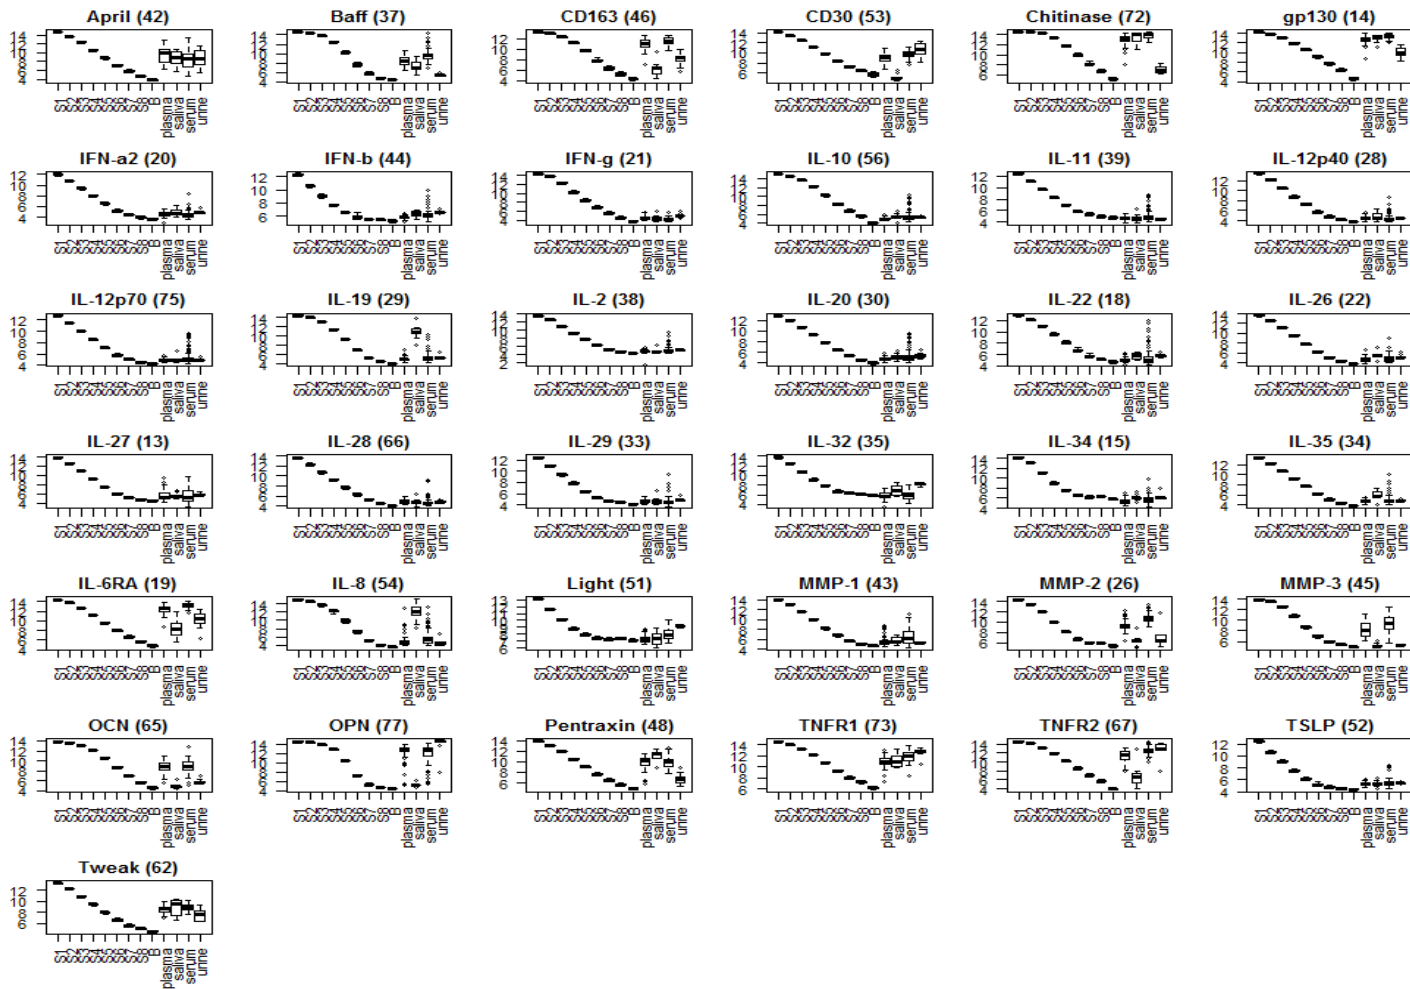

Figure S1: Distributions per analyte for test sample tissue types (plasma, saliva, serum and urine) together with their associated standards (S1, ..., S8) and blank (B) readings. Y-axis represents the  $\log_2(FI)$ .

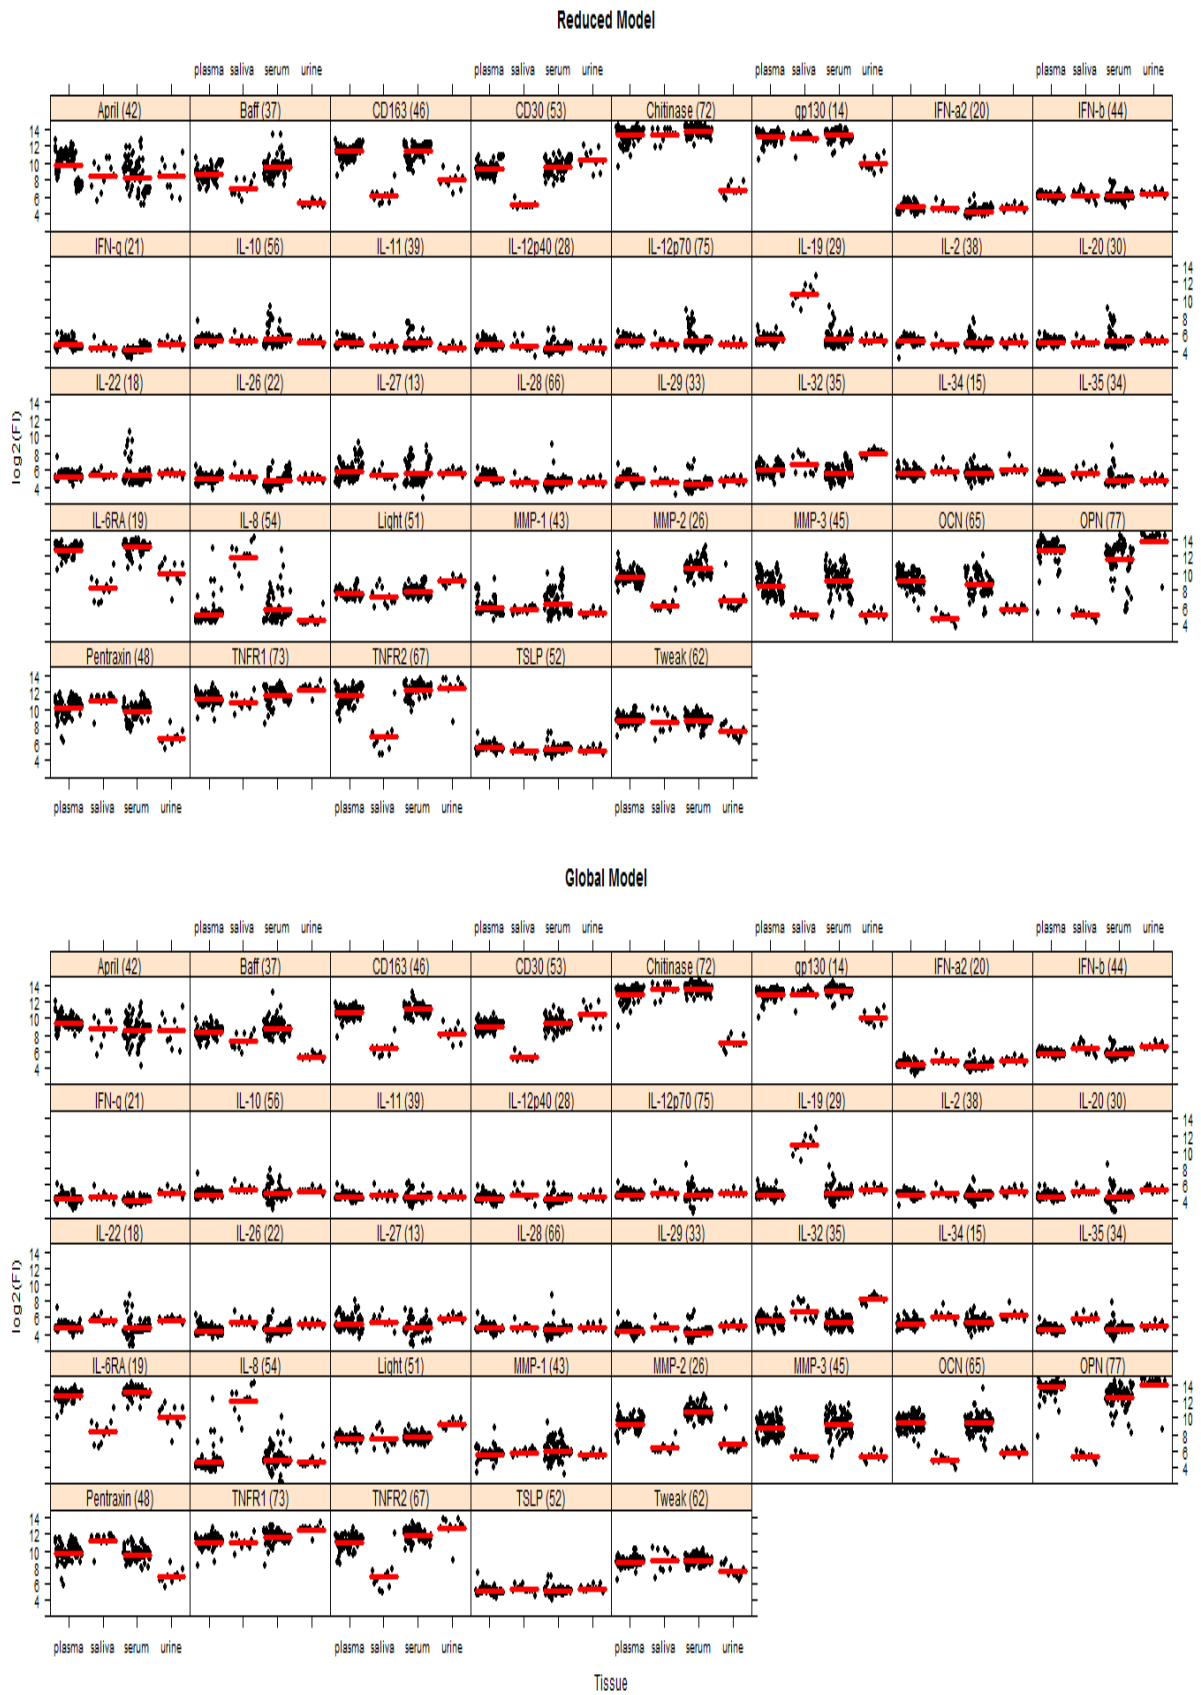

**Figure S2: Comparison between global and reduced mixed-effects models. Note for the global model, the cluster of points (residuals) around each conditional mean response (red line) is tighter than that seen in the reduced model. Note both models contain the same number of samples per tissue (see main text for details).**



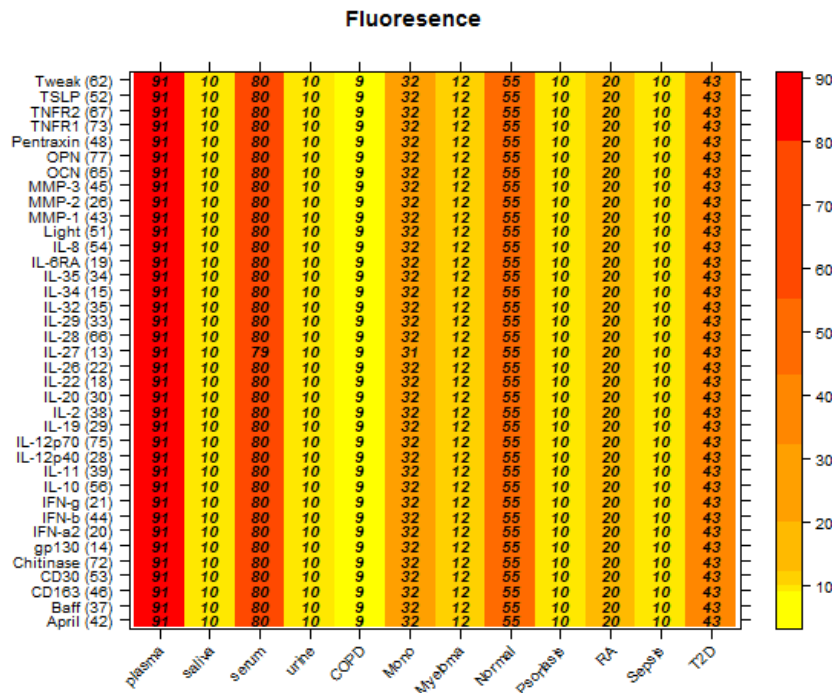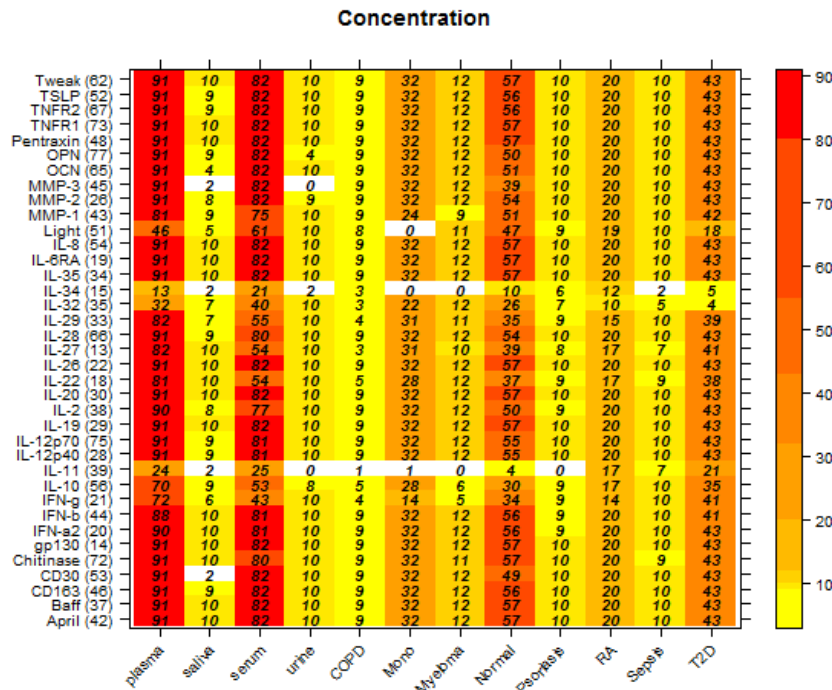

Figure S3: Arrays showing the number of fluorescence and concentration patient readings per analyte with respect to tissue and condition according to fluorescence or concentration data. Note for the fluorescence data there is one less reading (79) than expected (80) with respect to serum and IL-27. This is because one test for IL-27 in serum, failed to produce a fluorescence response. The fluorescence responses (FI) represent the median fluorescence (MFI) obtained from a set of individual beads, of the same type. The beads are detected and counted at the flow cytometer level and, per analyte per test and for the Bio-Plex Manager software; the absolute minimum number of beads to count per analyte for statistical meaningful values is 25 however, in practice all our assays are set up to count at least 50 beads. Abbreviations: COPD= chronic obstructive pulmonary disease, Mono = mononucleosis, RA = rheumatoid arthritis, T2D = type 2 diabetes.
